# Supplementary material for: Development and Characterization of Gel-Based Buccoadhesive Bilayer Formulation of Nifedipine
Source: MDPI journal article supplement (doi:10.3390/gels9090688), 2023-08-26
Supplement: s1 [file s1]

## **Supplementary Information**

### **Development and Characterization of Gel-Based Buccoadhesive Bilayer Formulation of Nifedipine**

**M. Alagusundaram <sup>1,\*</sup>, Nem Kumar Jain <sup>2</sup>, M. Yasmin Begum <sup>3,\*</sup>, S. Angala Parameswari <sup>4</sup>,  
Vinod Kumar Nelson <sup>5</sup>, Mohammad F. Bayan <sup>6</sup> and Balakumar Chandrasekaran <sup>6</sup>**

<sup>1</sup> Department of Pharmaceutics, School of Pharmacy, ITM University,  
Gwalior 474001, Madhya Pradesh, India

<sup>2</sup> Department of Pharmacology, School of Pharmacy, ITM University,  
Gwalior 474001, Madhya Pradesh, India; nemjain.pharma@itm university.ac.in

<sup>3</sup> Department of Pharmaceutics, College of Pharmacy, King Khalid University,  
Abha 61421, Saudi Arabia

<sup>4</sup> Department of Pharmaceutical Analysis, Jagan's Institute of Pharmaceutical Sciences,  
Nellore 524346, Andhra Pradesh, India; eswarialagusundaram@gmail.com

<sup>5</sup> Department of Pharmaceutical Chemistry, Raghavendra Institute of Pharmaceutical  
Education and Research, Anantapuramu 515721, Andhra Pradesh, India;  
vinod.kumar457@gmail.com

<sup>6</sup> Faculty of Pharmacy, Philadelphia University, P.O. Box 1, Amman 19392, Jordan;  
mbayan@philadelphia.edu.jo (M.F.B.); balakumar@philadelphia.edu.jo (B.C.)

\* Correspondence: alagusundaram.sop@itm university.ac.in (M.A.);  
ybajen@kku.edu.sa (M.Y.B.)

## Table of Contents

| S. No. | Contents                                               | Page Number |
|--------|--------------------------------------------------------|-------------|
| 1      | Figure S1. DSC curve of Nifedipine                     | 3           |
| 2      | Figure S2. DSC curve of HPMC K 100                     | 3           |
| 3      | Figure S3. DSC curve of SCMC                           | 4           |
| 4      | Figure S4. DSC curve of Carbopol 934                   | 4           |
| 5      | Figure S5. DSC curve of Nifedipine and polymer mixture | 5           |
| 6      | Figure S6. Controlled buccal mucosa                    | 5           |
| 7      | Figure S7. Test buccal mucosa                          | 6           |
| 8      | Table S1. Swelling index data for all formulations     | 6           |
| 9      | Table S2. Ex-vivo buccoadhesive strength               | 7           |
| 10     | Table S3. In-vitro and Higuchi's release data          | 7           |
| 11     | Table S4. Peppa's data                                 | 8           |
| 12     | Table S5. Ex-vivo permeation data of NT5               | 9           |
| 13     | Table S6. In-vivo drug release of NT5                  | 9           |
| 14     | Table S7. In-vitro and In-vivo correlation data of NT5 | 10          |

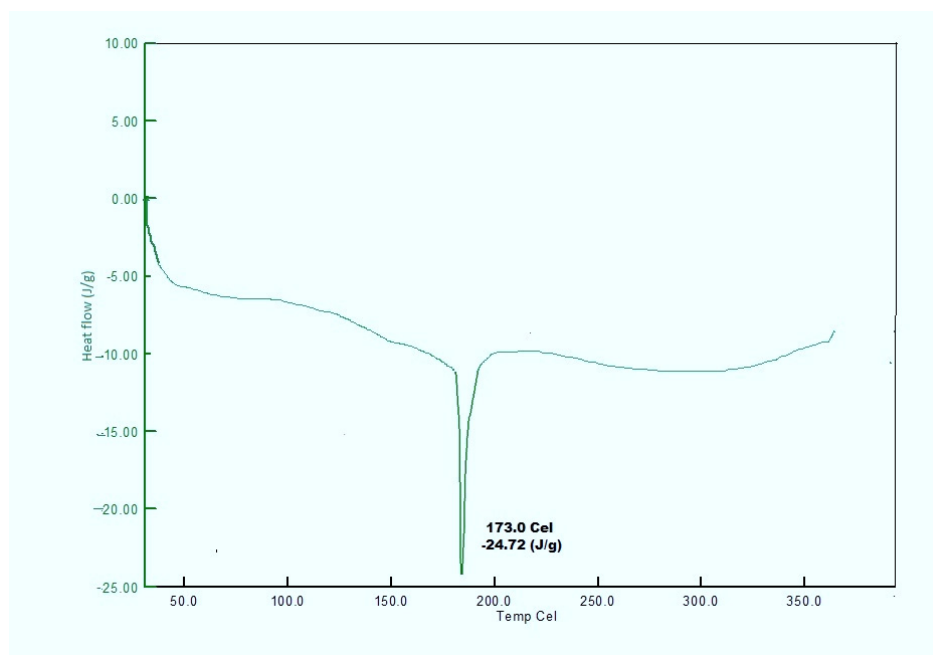

**Figure S1.** DSC curve of Nifedipine

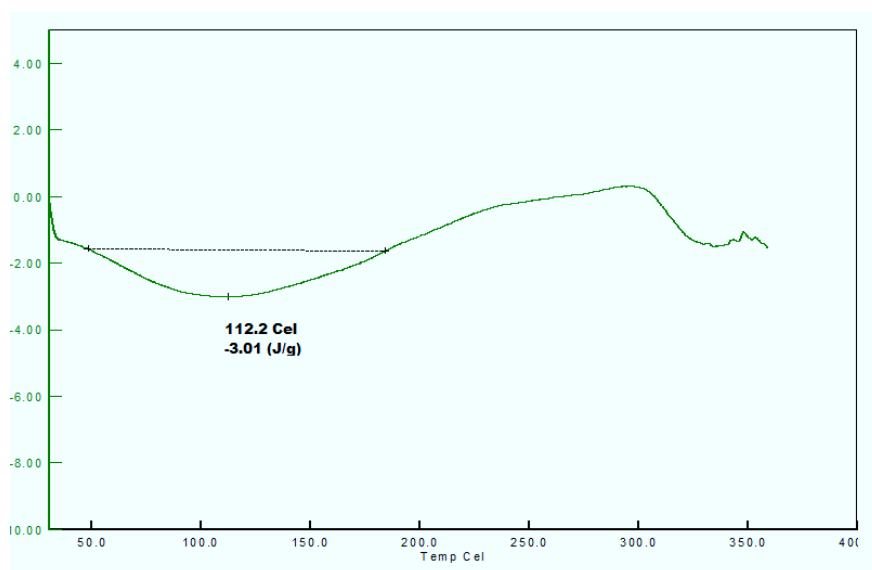

**Figure S2.** DSC curve of HPMC K 100

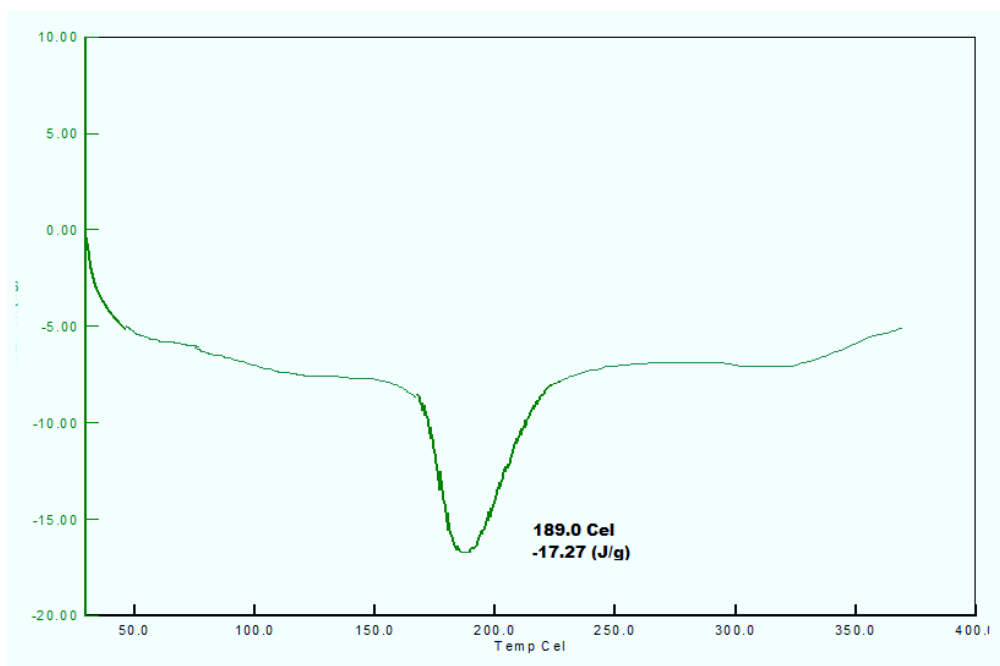

**Figure S3.** DSC curve of SCMC

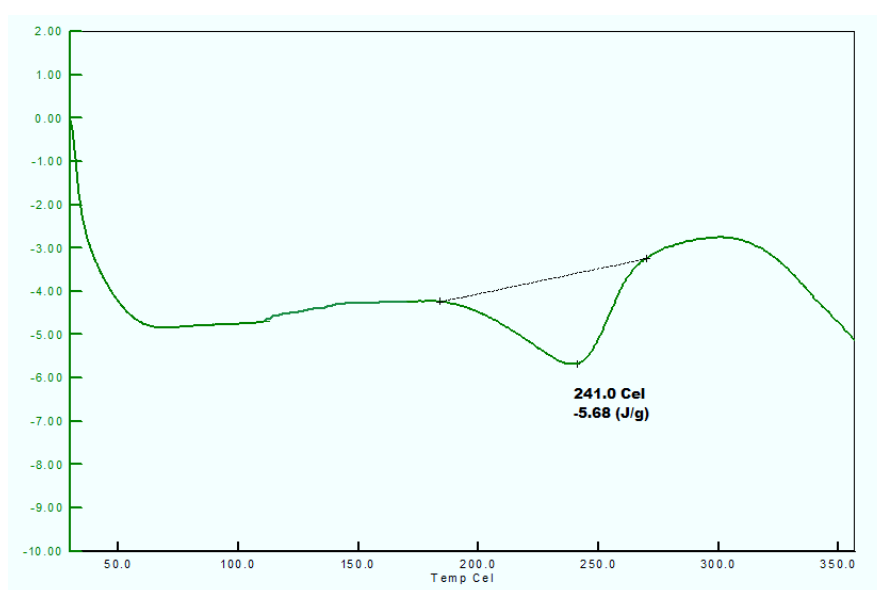

**Figure S4.** DSC curve of Carbopol 934

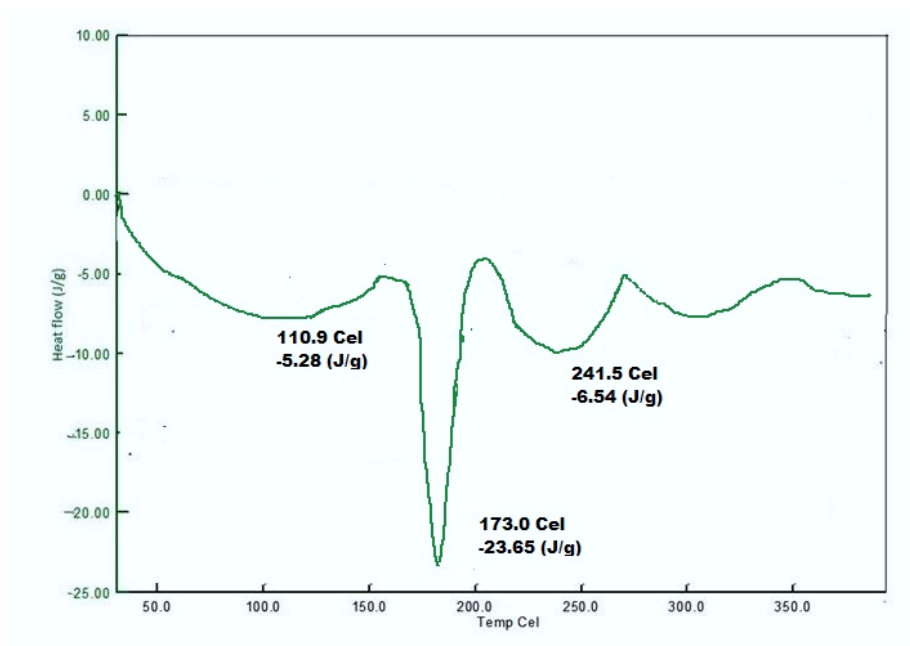

**Figure S5.** DSC curve of Nifedipine and polymer mixture

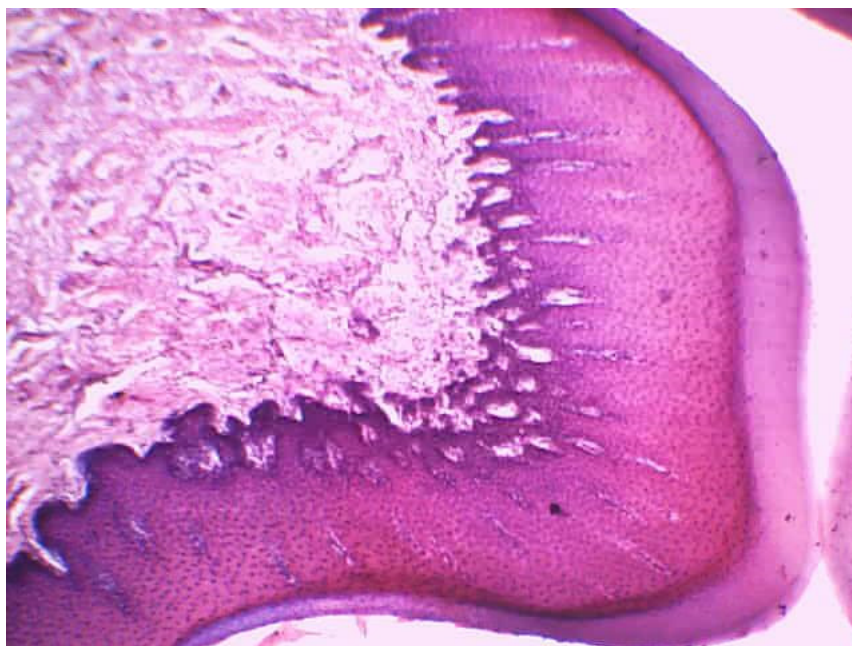

**Figure S6.** Controlled buccal mucosa

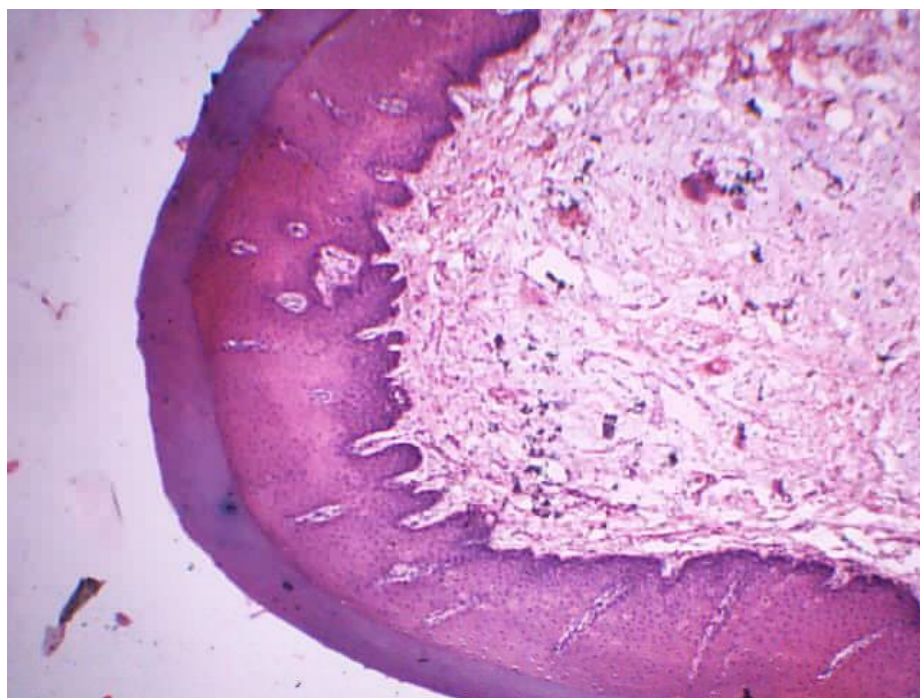

**Figure S7.** Test buccal mucosa

**Table S1.** Swelling index data for all formulations

| Formula<br>tion code | Swelling index $\pm$ S.D |                  |                  |                  |                  |                  |
|----------------------|--------------------------|------------------|------------------|------------------|------------------|------------------|
|                      | Time in h                |                  |                  |                  |                  |                  |
|                      | 1                        | 2                | 3                | 4                | 5                | 6                |
| NT1                  | 26.09 $\pm$ 0.76         | 38.61 $\pm$ 1.08 | 55.58 $\pm$ 0.80 | 64.96 $\pm$ 0.70 | 71.27 $\pm$ 0.76 | 74.84 $\pm$ 0.27 |
| NT2                  | 22.23 $\pm$ 0.72         | 32.15 $\pm$ 0.91 | 40.75 $\pm$ 0.46 | 50.71 $\pm$ 0.54 | 60.04 $\pm$ 0.61 | 65.21 $\pm$ 0.53 |
| NT3                  | 19.19 $\pm$ 0.64         | 24.48 $\pm$ 0.63 | 37.81 $\pm$ 0.67 | 45.84 $\pm$ 0.68 | 51.8 $\pm$ 0.66  | 55.77 $\pm$ 0.51 |
| NT4                  | 23.73 $\pm$ 1.08         | 33.97 $\pm$ 0.48 | 46.13 $\pm$ 0.93 | 51.81 $\pm$ 0.69 | 63.84 $\pm$ 0.28 | 68.91 $\pm$ 0.93 |
| NT5                  | 27.39 $\pm$ 1.03         | 41.62 $\pm$ 0.90 | 57.67 $\pm$ 0.53 | 66.68 $\pm$ 0.75 | 71.25 $\pm$ 0.61 | 78.6 $\pm$ 1.04  |
| NT6                  | 19.81 $\pm$ 0.67         | 31.39 $\pm$ 0.98 | 39.81 $\pm$ 0.67 | 51.12 $\pm$ 0.62 | 57.52 $\pm$ 1.08 | 62.76 $\pm$ 0.43 |
| NT7                  | 16.01 $\pm$ 0.84         | 25.64 $\pm$ 0.75 | 32.76 $\pm$ 0.54 | 41.10 $\pm$ 0.88 | 46.46 $\pm$ 0.87 | 51.76 $\pm$ 0.64 |
| NT8                  | 26.65 $\pm$ 0.72         | 40.98 $\pm$ 0.79 | 56.93 $\pm$ 0.86 | 65.29 $\pm$ 0.97 | 71.28 $\pm$ 0.30 | 74.84 $\pm$ 0.60 |
| NT9                  | 23.35 $\pm$ 1.12         | 31.43 $\pm$ 0.64 | 41.91 $\pm$ 0.93 | 51.66 $\pm$ 0.57 | 61.44 $\pm$ 0.63 | 65.69 $\pm$ 0.64 |
| NT10                 | 31.47 $\pm$ 0.93         | 42.62 $\pm$ 0.77 | 58.41 $\pm$ 0.79 | 67.45 $\pm$ 0.96 | 73.17 $\pm$ 0.61 | 76.85 $\pm$ 0.65 |

**Table S2. Ex-vivo buccoadhesive strength**

| <b>Formulation code</b> | <b>Buccoadhesive Strength in g</b> |
|-------------------------|------------------------------------|
| NT1                     | 33.2                               |
| NT2                     | 22.6                               |
| NT3                     | 23.5                               |
| NT4                     | 26.4                               |
| NT5                     | 34.6                               |
| NT6                     | 19.2                               |
| NT7                     | 22.1                               |
| NT8                     | 33.8                               |
| NT9                     | 23.4                               |
| NT10                    | 32.7                               |

**Table S3. In-vitro and Higuchi's release data**

| <b>TIME</b> | <b>Sqrt</b> | <b>NT1</b> | <b>NT2</b> | <b>NT3</b> | <b>NT4</b> | <b>NT5</b> | <b>NT6</b> | <b>NT7</b> | <b>NT8</b> | <b>NT9</b> | <b>NT10</b> |
|-------------|-------------|------------|------------|------------|------------|------------|------------|------------|------------|------------|-------------|
| 0           | 0           | 0          | 0          | 0          | 0          | 0          | 0          | 0          | 0          | 0          | 0           |
| 1           | 1           | 10.8       | 12.6       | 11.8       | 13.4       | 12.8       | 11.2       | 14.2       | 10.2       | 13.2       | 11.6        |
| 2           | 1.41421     | 18.2       | 23.2       | 21.6       | 22.8       | 19.2       | 20.6       | 25.6       | 18.6       | 23.8       | 18.4        |
| 3           | 1.73205     | 26.1       | 31.4       | 32.8       | 33.2       | 28.8       | 31.2       | 37.1       | 25.2       | 32.4       | 24.6        |
| 4           | 2           | 34.2       | 42.6       | 43.2       | 45.1       | 36.2       | 42.4       | 46.5       | 32.8       | 43.2       | 32.2        |
| 5           | 2.23607     | 43.2       | 49.8       | 52.1       | 53.6       | 43.4       | 48.6       | 54.8       | 42.6       | 51.2       | 43.8        |
| 6           | 2.44949     | 51.4       | 57.6       | 63.6       | 64.2       | 50.6       | 56.8       | 66.6       | 52.4       | 59.4       | 51.6        |
| 7           | 2.64575     | 62.2       | 68.2       | 70.6       | 71.9       | 61.2       | 67.4       | 75.2       | 60.8       | 68.3       | 61.8        |
| 8           | 2.82843     | 71.6       | 74.6       | 78.4       | 79.2       | 69.6       | 73.2       | 83.4       | 71.6       | 76.2       | 72.2        |
| 9           | 3           | 81.2       | 81.2       | 83.9       | 84.4       | 78.2       | 80.6       | 90.2       | 82.3       | 81.8       | 79.4        |
| 10          | 3.16228     | 87.4       | 89.6       | 91.2       | 92.4       | 86.4       | 88.2       | 97.4       | 87.2       | 89.4       | 86.2        |
| 11          | 3.316625    | 92.4       | 97.1       | 97.4       | 98.6       | 92.8       | 97.6       |            | 91.6       | 98.2       | 91.3        |
| 12          | 3.464102    | 98.3       |            |            |            | 98.6       |            |            | 98.4       |            | 98.1        |

**Table S4. Peppa's data**

| <b>LOG<br/>T</b> | <b>LOG % R</b> |             |             |             |             |             |             |             |             |             |
|------------------|----------------|-------------|-------------|-------------|-------------|-------------|-------------|-------------|-------------|-------------|
|                  | NT1            | NT2         | NT3         | NT4         | NT5         | NT6         | NT7         | NT8         | NT9         | NT10        |
| 0                | 1.033<br>42    | 1.100<br>37 | 1.071<br>88 | 1.127<br>1  | 1.107<br>21 | 1.049<br>22 | 1.152<br>29 | 1.008<br>6  | 1.120<br>57 | 1.064<br>46 |
| 0.3010<br>3      | 1.260<br>07    | 1.365<br>48 | 1.334<br>45 | 1.357<br>93 | 1.283<br>3  | 1.313<br>86 | 1.408<br>24 | 1.269<br>51 | 1.376<br>57 | 1.264<br>82 |
| 0.4771<br>21     | 1.416<br>64    | 1.496<br>93 | 1.515<br>87 | 1.521<br>14 | 1.459<br>39 | 1.494<br>15 | 1.569<br>37 | 1.401<br>4  | 1.510<br>54 | 1.390<br>93 |
| 0.6020<br>6      | 1.534<br>03    | 1.629<br>41 | 1.635<br>48 | 1.654<br>17 | 1.558<br>71 | 1.627<br>36 | 1.667<br>45 | 1.515<br>87 | 1.635<br>48 | 1.507<br>85 |
| 0.6989<br>7      | 1.635<br>48    | 1.697<br>23 | 1.716<br>84 | 1.729<br>16 | 1.637<br>49 | 1.686<br>64 | 1.738<br>78 | 1.629<br>41 | 1.709<br>26 | 1.641<br>47 |
| 0.7781<br>51     | 1.710<br>96    | 1.760<br>42 | 1.803<br>46 | 1.807<br>53 | 1.704<br>15 | 1.754<br>34 | 1.823<br>47 | 1.719<br>33 | 1.773<br>78 | 1.712<br>65 |
| 0.8450<br>98     | 1.793<br>79    | 1.833<br>78 | 1.848<br>8  | 1.856<br>73 | 1.786<br>75 | 1.828<br>65 | 1.876<br>22 | 1.783<br>9  | 1.834<br>42 | 1.790<br>99 |
| 0.9030<br>9      | 1.854<br>91    | 1.872<br>74 | 1.894<br>32 | 1.898<br>72 | 1.842<br>61 | 1.864<br>51 | 1.921<br>17 | 1.854<br>91 | 1.881<br>95 | 1.858<br>54 |
| 0.9542<br>43     | 1.909<br>56    | 1.909<br>55 | 1.923<br>76 | 1.926<br>34 | 1.893<br>21 | 1.906<br>33 | 1.955<br>21 | 1.915<br>39 | 1.912<br>75 | 1.899<br>82 |
| 1                | 1.941<br>51    | 1.952<br>31 | 1.959<br>99 | 1.965<br>67 | 1.936<br>51 | 1.945<br>47 | 1.988<br>56 | 1.940<br>52 | 1.951<br>34 | 1.935<br>51 |
| 1.0413<br>93     | 1.965<br>67    | 1.987<br>22 | 1.988<br>56 | 1.993<br>87 | 1.967<br>55 | 1.989<br>45 |             | 1.961<br>89 | 1.992<br>11 | 1.960<br>47 |
| 1.0791<br>81     | 1.992<br>55    |             |             |             | 1.993<br>88 |             |             | 1.992<br>99 |             | 1.991<br>67 |



**Table S5. Ex-vivo permeation data of NT5**

| <b>Time (h)</b> | <b>Cumulative %<br/>Drug Release</b> |
|-----------------|--------------------------------------|
| 0               | 0                                    |
| 1               | 7.24                                 |
| 2               | 13.15                                |
| 3               | 22.18                                |
| 4               | 29.41                                |
| 5               | 41.26                                |
| 6               | 50.42                                |
| 7               | 57.6                                 |
| 8               | 63.75                                |
| 9               | 71.32                                |
| 10              | 78.24                                |
| 11              | 86.53                                |
| 12              | 93.81                                |

**Table S6. In-vivo drug release of NT5**

| <b>Time<br/>in h</b> | <b>Cumulative<br/>percentage<br/>drug<br/>release</b> |
|----------------------|-------------------------------------------------------|
| <b>0</b>             | <b>0</b>                                              |
| 1                    | 9.62                                                  |
| 3                    | 23.48                                                 |
| 6                    | 44.69                                                 |
| 9                    | 67.84                                                 |
| 12                   | 90.74                                                 |

**Table S7. In-vitro and In-vivo correlation data of NT5**

| <b>Time<br/>in h</b> | <b><i>In-vivo</i><br/>cumulative<br/>% drug<br/>release</b> | <b><i>In-vitro</i><br/>cumulative<br/>% drug<br/>release</b> |
|----------------------|-------------------------------------------------------------|--------------------------------------------------------------|
|                      | <i>0</i>                                                    | <i>0</i>                                                     |
| 1                    | 9.62                                                        | 12.8                                                         |
| 3                    | 23.48                                                       | 28.8                                                         |
| 6                    | 44.69                                                       | 50.6                                                         |
| 9                    | 67.84                                                       | 78.2                                                         |
| 12                   | 90.74                                                       | 98.6                                                         |
